# Supplementary material
Source: PubMed Central journal article supplement (PMC7609484)
Supplement: 13311_2020_860_MOESM2_ESM.pdf [file 13311_2020_860_MOESM2_ESM.pdf]

# **SIRT2 inhibition improves functional motor recovery after peripheral nerve injury**

David Romeo-Guitart, Tatiana Leiva-Rodríguez, and Caty Casas\*

## **Affiliations**

<sup>1</sup> *Institut de Neurociències (INc) and Department of Cell Biology, Physiology and Immunology, Universitat Autònoma de Barcelona (UAB), & Centro de Investigación Biomédica en Red sobre Enfermedades Neurodegenerativas (CIBERNED), Bellaterra, Barcelona, Spain,*

To whom correspondence should be addressed: Caty Casas Louzao, *Unitat de Fisiologia Mèdica, Facultat de Medicina, Universitat Autònoma de Barcelona, E-08193 Bellaterra, Barcelona, Spain. Tel: +34-935811324, Fax: +34-935812986, E-mail: [Caty.Casas@uab.cat](mailto:Caty.Casas@uab.cat)*

## SUPPLEMENTARY INFORMATION

- **Supplementary Figures**

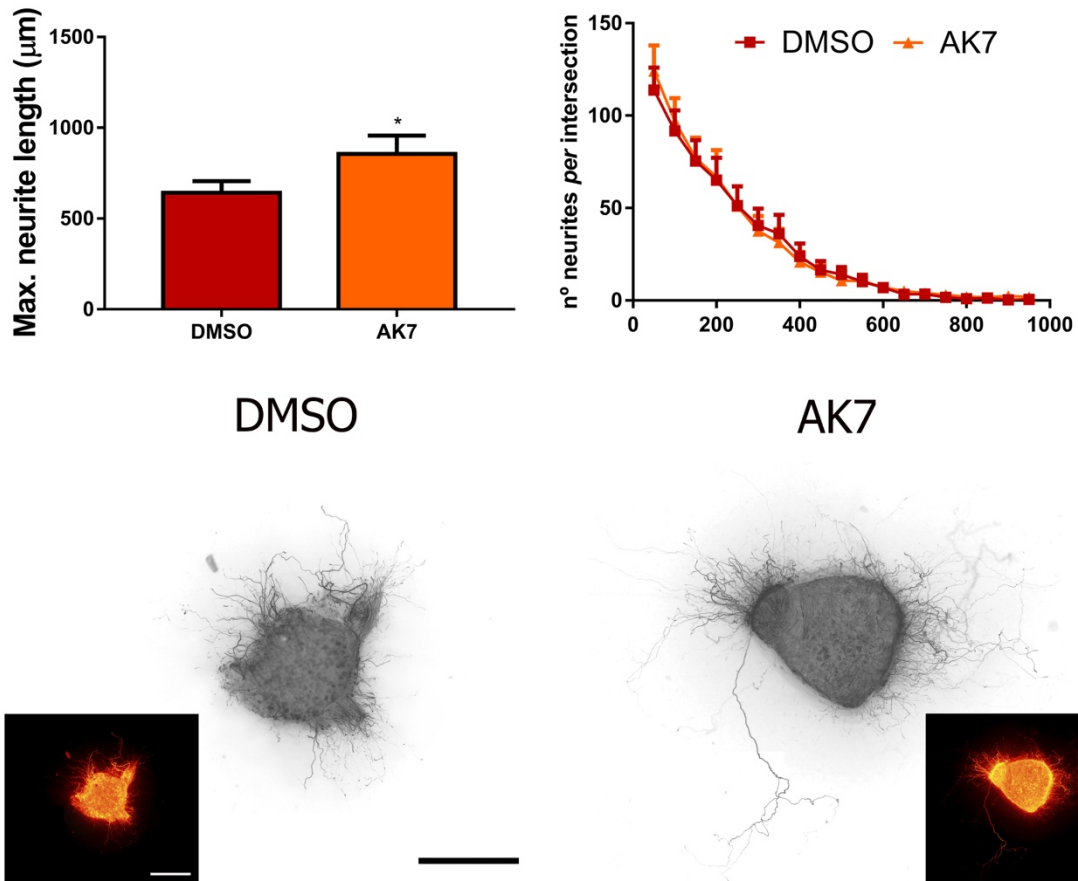

**Fig. S1. Top,** Graph showing the number of neurites per intersection and the maximum neurite elongation in vehicle- (Veh) and AK7-treated DRGs embedded in collagen. (n=11-12, t-test, \* $p < 0.05$  vs. Veh). **Bottom:** Representative microphotographs of DRG cultures. Scale bar = 500  $\mu\text{m}$ .

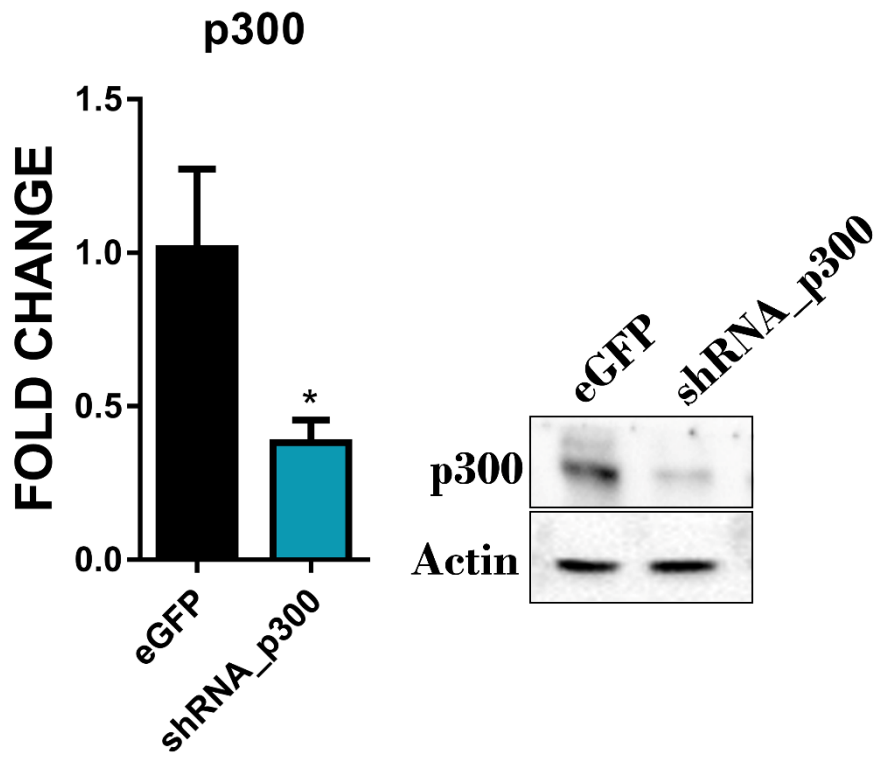

**Fig. S2.** Western blots and histogram showing the analysis of p300 from SH-SY5Y cells transfected with eGFP or shRNA\_p300 plasmids (n=3-4, t-test, \*  $P < 0.05$  vs. eGFP).
